# Supplementary material
Source: PubMed Central journal article supplement (PMC4526430)
Supplement: NIHMS694845-supplement-3.pdf [file NIHMS694845-supplement-3.pdf]

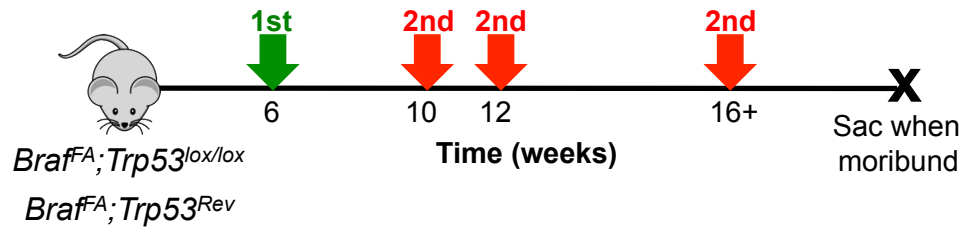

| Time between infections | Number of Mice with Adenocarcinomas |
|-------------------------|-------------------------------------|
| 4 wk                    | 26/38 (68.4%)                       |
| 6 wk                    | 8/36 (22.2%)                        |
| 10 wk or more           | 4/27 (14.8%)                        |

**Supplementary Table 1**
